# Supplementary material
Source: PubMed Central journal article supplement (PMC3002467)

## SUPPLEMENTARY DATA

Cu-Zn- and Fe-SOD isoforms in phycobionts of *Ramalina farinacea*. Soluble proteins from isolated TR1 cells (20  $\mu$ g) were separated by electrophoresis in ND-PAGE and SOD activities were developed as described previously (Lascano *et al.*, 2001, *Functional Plant Biology* **28**: 1095–1102). Different SOD isoforms were distinguished based on sensitivity to inhibition by 2 mM KCN and 5 mM H<sub>2</sub>O<sub>2</sub>. Qualitatively identical results were obtained with TR9 extracts (data not shown).

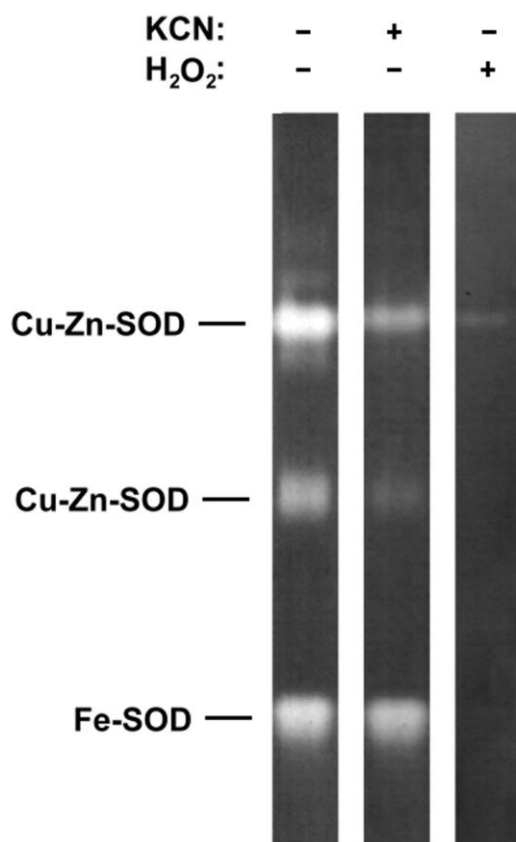

Supplement: supp_mcq206_mcq206supp.pdf [file supp_mcq206_mcq206supp.pdf]
